# Supplementary material for: A Zn(II)-Based Sql Type 2D Coordination Polymer as a Highly Sensitive and Selective Turn-On Fluorescent Probe for Al3+
Source: MDPI journal article supplement (doi:10.3390/molecules26237392), 2021-12-06

## checkCIF/PLATON report

Structure factors have been supplied for datablock(s) pvl632\_a\_sq

THIS REPORT IS FOR GUIDANCE ONLY. IF USED AS PART OF A REVIEW PROCEDURE FOR PUBLICATION, IT SHOULD NOT REPLACE THE EXPERTISE OF AN EXPERIENCED CRYSTALLOGRAPHIC REFEREE.

No syntax errors found.      CIF dictionary      Interpreting this report

### Datablock: pvl632\_a\_sq

---

|                        |                                              |                                |
|------------------------|----------------------------------------------|--------------------------------|
| Bond precision:        | C-C = 0.0041 A                               | Wavelength=0.71073             |
| Cell:                  | a=13.3256(3)                                 | b=25.4765(6)      c=25.8209(7) |
|                        | alpha=90                                     | beta=104.918(1)      gamma=90  |
| Temperature:           | 150 K                                        |                                |
|                        | Calculated                                   | Reported                       |
| Volume                 | 8470.5(4)                                    | 8470.5(4)                      |
| Space group            | P 21/c                                       | P 21/c                         |
| Hall group             | -P 2ybc                                      | -P 2ybc                        |
| Moiety formula         | C24 H14 N8 O4 S Zn, C3 H7 N<br>O [+ solvent] | ?                              |
| Sum formula            | C27 H21 N9 O5 S Zn [+<br>solvent]            | C27 H21 N9 O5 S Zn             |
| Mr                     | 648.98                                       | 648.98                         |
| Dx, g cm <sup>-3</sup> | 1.527                                        | 1.526                          |
| Z                      | 12                                           | 12                             |
| Mu (mm <sup>-1</sup> ) | 0.999                                        | 0.999                          |
| F000                   | 3984.0                                       | 3979.0                         |
| F000'                  | 3990.25                                      |                                |
| h, k, lmax             | 19, 36, 36                                   | 19, 36, 36                     |
| Nref                   | 25870                                        | 25841                          |
| Tmin, Tmax             | 0.887, 0.932                                 | 0.652, 0.742                   |
| Tmin'                  | 0.771                                        |                                |

Correction method= # Reported T Limits: Tmin=0.652 Tmax=0.742

AbsCorr = MULTI-SCAN

Data completeness= 0.999

Theta(max)= 30.518

R(reflections)= 0.0563( 17090)

wR2(reflections)=  
0.1417( 25841)

S = 1.028

Npar= 1205

The following ALERTS were generated. Each ALERT has the format

**test-name\_ALERT\_alert-type\_alert-level.**

Click on the hyperlinks for more details of the test.

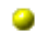

### Alert level C

|                   |                                                  |                             |       |        |
|-------------------|--------------------------------------------------|-----------------------------|-------|--------|
| PLAT213_ALERT_2_C | Atom N2                                          | has ADP max/min Ratio ..... | 3.8   | prolat |
| PLAT213_ALERT_2_C | Atom N3                                          | has ADP max/min Ratio ..... | 4.0   | prolat |
| PLAT213_ALERT_2_C | Atom O2                                          | has ADP max/min Ratio ..... | 3.2   | prolat |
| PLAT215_ALERT_3_C | Disordered S2'                                   | has ADP max/min Ratio ..... | 3.2   | Note   |
| PLAT220_ALERT_2_C | NonSolvent Resd 1 N                              | Ueq(max)/Ueq(min) Range     | 4.1   | Ratio  |
| PLAT220_ALERT_2_C | NonSolvent Resd 3 O                              | Ueq(max)/Ueq(min) Range     | 3.8   | Ratio  |
| PLAT241_ALERT_2_C | High 'MainMol' Ueq as Compared to Neighbors of   |                             | N2    | Check  |
| PLAT241_ALERT_2_C | High 'MainMol' Ueq as Compared to Neighbors of   |                             | N3    | Check  |
| PLAT244_ALERT_4_C | Low 'Solvent' Ueq as Compared to Neighbors of    |                             | N28   | Check  |
| PLAT244_ALERT_4_C | Low 'Solvent' Ueq as Compared to Neighbors of    |                             | N1    | Check  |
| PLAT250_ALERT_2_C | Large U3/U1 Ratio for Average U(i,j) Tensor .... |                             | 2.7   | Note   |
| PLAT250_ALERT_2_C | Large U3/U1 Ratio for Average U(i,j) Tensor .... |                             | 3.4   | Note   |
| PLAT906_ALERT_3_C | Large K Value in the Analysis of Variance .....  |                             | 2.876 | Check  |
| PLAT911_ALERT_3_C | Missing FCF Refl Between Thmin & STh/L= 0.600    |                             | 5     | Report |
| PLAT975_ALERT_2_C | Check Calcd Resid. Dens. 0.99A                   | From O2                     | 1.28  | eA-3   |
| PLAT975_ALERT_2_C | Check Calcd Resid. Dens. 0.82A                   | From O14                    | 0.54  | eA-3   |
| PLAT976_ALERT_2_C | Check Calcd Resid. Dens. 0.84A                   | From O2                     | -0.51 | eA-3   |

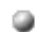

### Alert level G

|                   |                                                  |                 |       |       |
|-------------------|--------------------------------------------------|-----------------|-------|-------|
| PLAT004_ALERT_5_G | Polymeric Structure Found with Maximum Dimension |                 | 2     | Info  |
| PLAT083_ALERT_2_G | SHELXL Second Parameter in WGHT                  | Unusually Large | 9.94  | Why ? |
| PLAT300_ALERT_4_G | Atom Site Occupancy of S2                        | Constrained at  | 0.5   | Check |
| PLAT300_ALERT_4_G | Atom Site Occupancy of S2'                       | Constrained at  | 0.5   | Check |
| PLAT300_ALERT_4_G | Atom Site Occupancy of O17                       | Constrained at  | 0.6   | Check |
| PLAT300_ALERT_4_G | Atom Site Occupancy of O1                        | Constrained at  | 0.4   | Check |
| PLAT300_ALERT_4_G | Atom Site Occupancy of C81                       | Constrained at  | 0.6   | Check |
| PLAT300_ALERT_4_G | Atom Site Occupancy of C181                      | Constrained at  | 0.6   | Check |
| PLAT300_ALERT_4_G | Atom Site Occupancy of C82                       | Constrained at  | 0.4   | Check |
| PLAT300_ALERT_4_G | Atom Site Occupancy of C180                      | Constrained at  | 0.4   | Check |
| PLAT300_ALERT_4_G | Atom Site Occupancy of H81A                      | Constrained at  | 0.6   | Check |
| PLAT300_ALERT_4_G | Atom Site Occupancy of H81B                      | Constrained at  | 0.6   | Check |
| PLAT300_ALERT_4_G | Atom Site Occupancy of H81C                      | Constrained at  | 0.6   | Check |
| PLAT300_ALERT_4_G | Atom Site Occupancy of H181                      | Constrained at  | 0.6   | Check |
| PLAT300_ALERT_4_G | Atom Site Occupancy of H18A                      | Constrained at  | 0.4   | Check |
| PLAT300_ALERT_4_G | Atom Site Occupancy of H18B                      | Constrained at  | 0.4   | Check |
| PLAT300_ALERT_4_G | Atom Site Occupancy of H18C                      | Constrained at  | 0.4   | Check |
| PLAT300_ALERT_4_G | Atom Site Occupancy of H82                       | Constrained at  | 0.4   | Check |
| PLAT301_ALERT_3_G | Main Residue Disorder .....                      | (Resd 1 )       | 3%    | Note  |
| PLAT302_ALERT_4_G | Anion/Solvent/Minor-Residue Disorder (Resd 4 )   |                 | 60%   | Note  |
| PLAT380_ALERT_4_G | Incorrectly? Oriented X(sp2)-Methyl Moiety ..... |                 | C76   | Check |
| PLAT412_ALERT_2_G | Short Intra XH3 .. XHn                           | H79A ..H181     | 2.01  | Ang.  |
|                   |                                                  | x,y,z =         | 1_555 | Check |
| PLAT432_ALERT_2_G | Short Inter X...Y Contact S2'                    | ..C45           | 3.25  | Ang.  |
|                   |                                                  | 1-x,1-y,1-z =   | 3_666 | Check |

|                   |                                                  |       |         |             |
|-------------------|--------------------------------------------------|-------|---------|-------------|
| PLAT432_ALERT_2_G | Short Inter X...Y Contact                        | O1    | ..C7    | 2.92 Ang.   |
|                   |                                                  |       | x,y,z = | 1_555 Check |
| PLAT605_ALERT_4_G | Largest Solvent Accessible VOID in the Structure |       |         | 288 A**3    |
| PLAT794_ALERT_5_G | Tentative Bond Valency for Zn1                   | (II)  | .       | 1.93 Info   |
| PLAT794_ALERT_5_G | Tentative Bond Valency for Zn2                   | (II)  | .       | 1.91 Info   |
| PLAT794_ALERT_5_G | Tentative Bond Valency for Zn3                   | (II)  | .       | 1.93 Info   |
| PLAT869_ALERT_4_G | ALERTS Related to the Use of SQUEEZE Suppressed  |       |         | ! Info      |
| PLAT883_ALERT_1_G | No Info/Value for _atom_sites_solution_primary   |       |         | Please Do ! |
| PLAT910_ALERT_3_G | Missing # of FCF Reflection(s) Below Theta(Min). |       |         | 1 Note      |
| PLAT912_ALERT_4_G | Missing # of FCF Reflections Above STh/L=        | 0.600 |         | 23 Note     |
| PLAT933_ALERT_2_G | Number of OMIT Records in Embedded .res File     | ...   |         | 4 Note      |
| PLAT941_ALERT_3_G | Average HKL Measurement Multiplicity             | ..... |         | 4.1 Low     |
| PLAT978_ALERT_2_G | Number C-C Bonds with Positive Residual Density. |       |         | 5 Info      |

---

0 **ALERT level A** = Most likely a serious problem - resolve or explain  
 0 **ALERT level B** = A potentially serious problem, consider carefully  
 17 **ALERT level C** = Check. Ensure it is not caused by an omission or oversight  
 35 **ALERT level G** = General information/check it is not something unexpected

1 ALERT type 1 CIF construction/syntax error, inconsistent or missing data  
 18 ALERT type 2 Indicator that the structure model may be wrong or deficient  
 6 ALERT type 3 Indicator that the structure quality may be low  
 23 ALERT type 4 Improvement, methodology, query or suggestion  
 4 ALERT type 5 Informative message, check

---

It is advisable to attempt to resolve as many as possible of the alerts in all categories. Often the minor alerts point to easily fixed oversights, errors and omissions in your CIF or refinement strategy, so attention to these fine details can be worthwhile. In order to resolve some of the more serious problems it may be necessary to carry out additional measurements or structure refinements. However, the purpose of your study may justify the reported deviations and the more serious of these should normally be commented upon in the discussion or experimental section of a paper or in the "special\_details" fields of the CIF. checkCIF was carefully designed to identify outliers and unusual parameters, but every test has its limitations and alerts that are not important in a particular case may appear. Conversely, the absence of alerts does not guarantee there are no aspects of the results needing attention. It is up to the individual to critically assess their own results and, if necessary, seek expert advice.

### **Publication of your CIF in IUCr journals**

A basic structural check has been run on your CIF. These basic checks will be run on all CIFs submitted for publication in IUCr journals (*Acta Crystallographica*, *Journal of Applied Crystallography*, *Journal of Synchrotron Radiation*); however, if you intend to submit to *Acta Crystallographica Section C* or *E* or *IUCrData*, you should make sure that full publication checks are run on the final version of your CIF prior to submission.

### **Publication of your CIF in other journals**

Please refer to the *Notes for Authors* of the relevant journal for any special instructions relating to CIF submission.

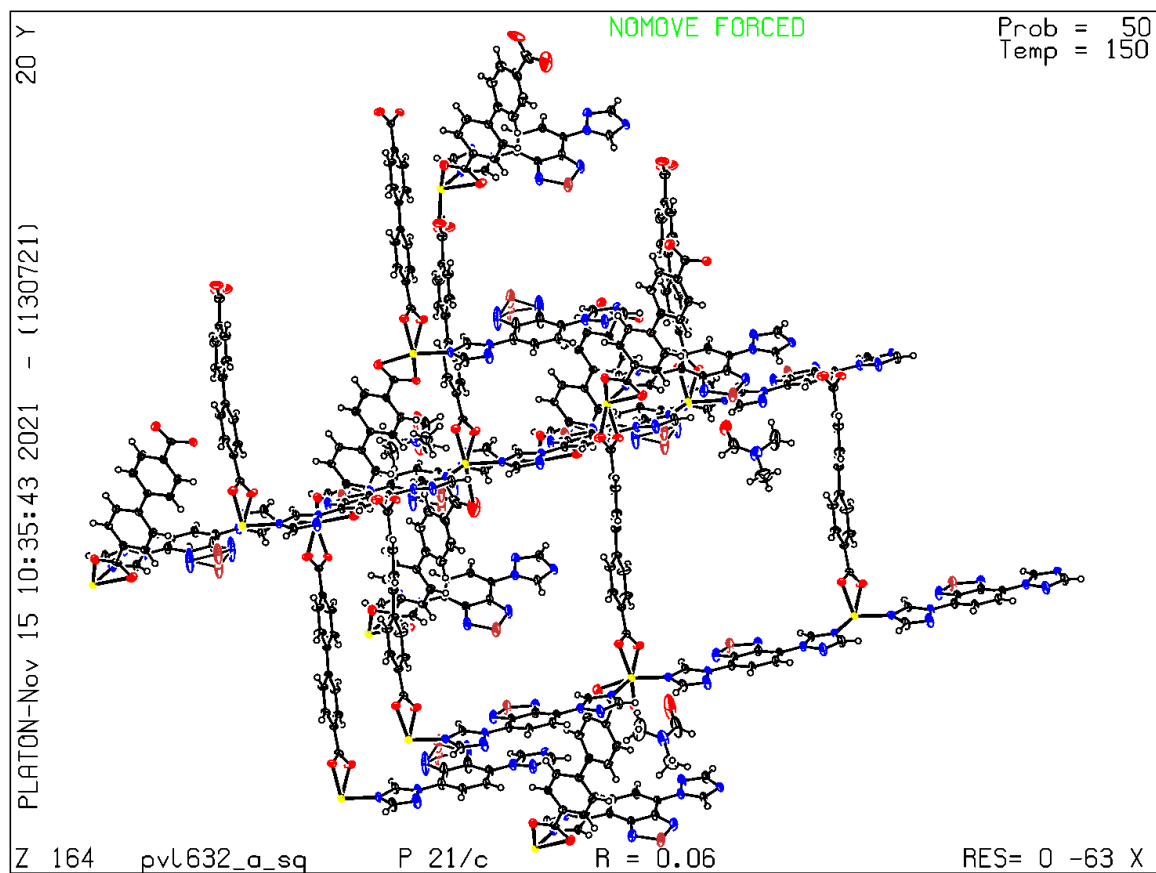

Supplement: s1 [file s1]
